# Supplementary material for: TFF3-dependent resistance of human colorectal adenocarcinoma cells HT-29/B6 to apoptosis is mediated by miR-491-5p regulation of lncRNA PRINS
Source: PubMed Central journal article supplement (PMC5279457; doi:10.1038/cddiscovery.2016.106), 2017-01-30
Supplement: cddiscovery2016106-s1.pdf [file cddiscovery2016106-s1.pdf]

# TFF3-dependent resistance of human colorectal adenocarcinoma cells HT-29/B6 to apoptosis is mediated by miR-491-5p regulation of lncRNA PRINS

Carlos Hanisch<sup>1</sup>, Jutta Sharbati<sup>1</sup>, Barbara Kutz-Lohroff<sup>1</sup>, Otmar Huber<sup>2</sup>, Ralf Einspanier<sup>1</sup>, Soroush Sharbati<sup>1\*</sup>

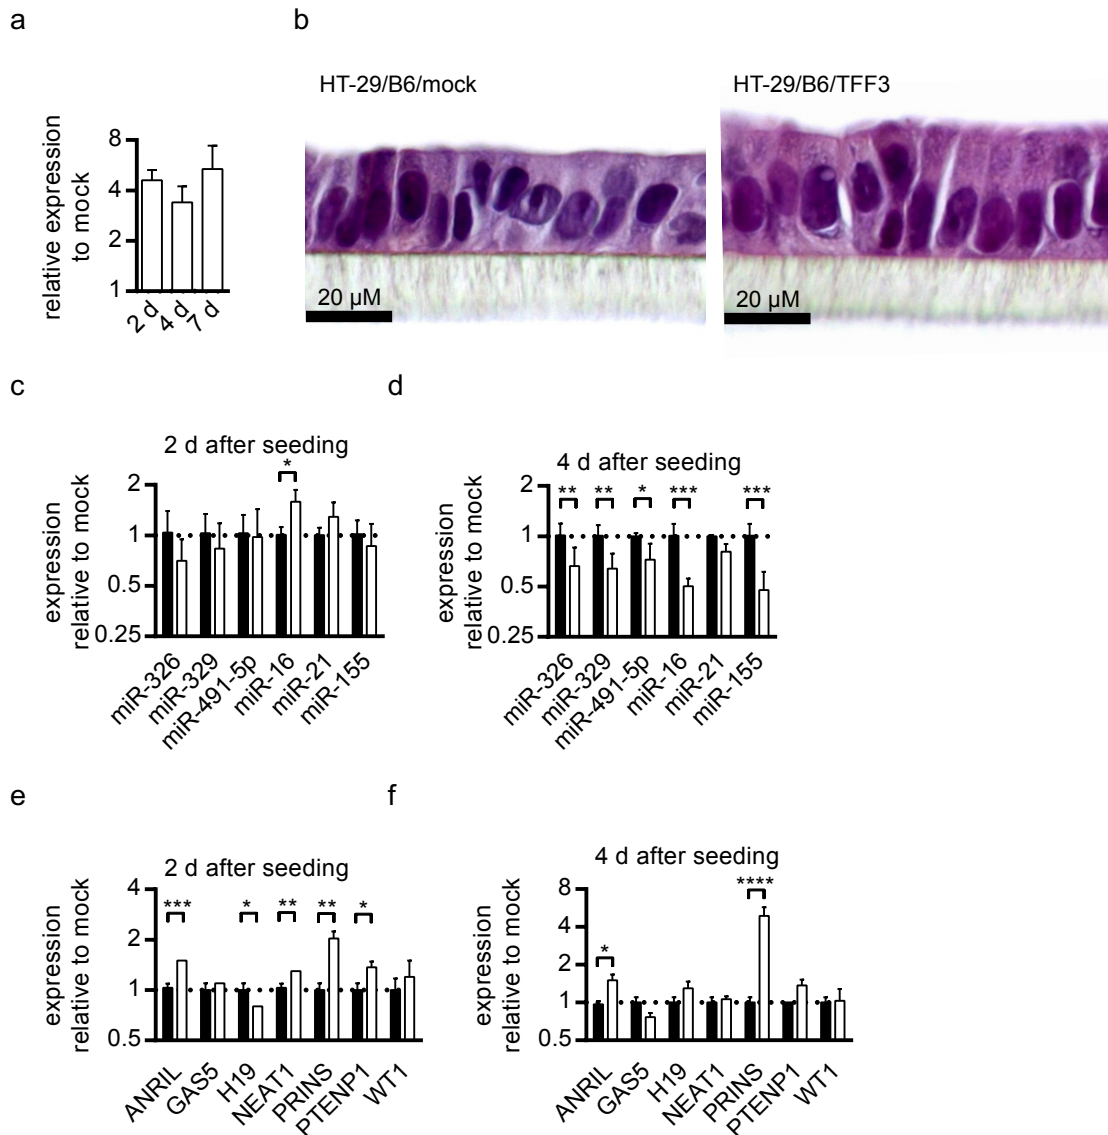

**Figure 1:** a) TFF3 expression in HT-29/B6/TFF3 compared with mock-transfected controls at days 2, 4 and 7 after seeding. b) H&E staining of differentiated HT-29/B6 subclones at 7 days after seeding. c & d) Expression of miRNAs in HT-29/B6/TFF3 (white columns) compared with HT-29/B6/mock (black columns) over the course of differentiation at 2 and 4 days after seeding. e & f) Expression of lncRNAs in HT-29/B6/TFF3 (white columns) compared with HT-29/B6/mock (black columns) over the course of differentiation at 2 and 4 days after seeding.

**Table 1:** miRNA targets identified by miRmap analysis (miRmap Score 99).

| hsa-miR-16-5p | hsa-miR-21-5p | hsa-miR-155-5p | hsa-miR-326  | hsa-miR-329 | hsa-miR-491-5p |
|---------------|---------------|----------------|--------------|-------------|----------------|
| RNF24         | RP11-766F14.2 | MARCH1         | SBK1         | DPY19L3     | AEN            |
| CBX6          | RAB22A        | ZMYM2          | SRGAP3       | SOX17       | SESN2          |
| CACNA2D1      | BMPR2         | PAQR3          | ZC3H12B      | DSTYK       | MTMR2          |
| KIAA1432      |               | KPNA5          | ZZEF1        | SRGAP3      | PBX2           |
| PRDM5         |               | NHLRC2         | TSPAN14      | PIK3C3      | RHPN1          |
| WDC1          |               | ZNF652         | AMOTL1       | ASH1L       | PFKFB2         |
| ATXN7L1       |               |                | LRRC55       | HLF         | RAP1GAP2       |
| C17orf51      |               |                | SYT9         | CA8         | RABL2B         |
| ZBTB34        |               |                | CBL          | DTNA        | CCL22          |
| ATG4B         |               |                | C16orf72     | PRDM5       | PPP1R18        |
| TMCC1         |               |                | PRICKLE2     | CDCA4       | PPP1R3B        |
| MYO5B         |               |                | C17orf51     | TMEM2       | CREB3L2        |
| PLAG1         |               |                | SUDS3        | CBL         | ZMYM4          |
| MAPK9         |               |                | STK35        | SYT2        | DOT1L          |
| CHD2          |               |                | KIAA0141     | PTPLB       | FIBCD1         |
| RAB31P        |               |                | NCR3LG1      | CTTNBP2NL   | GFOD1          |
| SREK1         |               |                | C1orf95      | CD2AP       | CBX6           |
| TMEM183A      |               |                | EIF4EBP2     | PLAG1       | NPTXR          |
| ATG14         |               |                | SDK2         | FAM46C      | GNG13          |
| MAN2A2        |               |                | RAB11FIP4    | KIAA2018    | TSC1           |
| TK2           |               |                | TREML2       | INO80D      | SRGAP3         |
| ABL2          |               |                | ANXA11       | TMOD2       | ATP11A         |
| ANKRD34C      |               |                | PCNX         | ABLIM1      | ONECUT3        |
| DESI1         |               |                | TMEM127      | LAMTOR3     | SNX33          |
| LIN7A         |               |                | CELSR1       | ABL2        | HEATR1         |
| UBE2Q1        |               |                | ADIPOQ       | UGT8        | ZDHHC14        |
| IPO9          |               |                | TMEM164      | BRI3BP      | C16orf52       |
| LUZP1         |               |                | NFATC2       | NFAT5       | Z99715.1       |
| SBNO1         |               |                | hsa-mir-4763 | RNF152      | SLIT1          |
| ZMAT3         |               |                | KIF6         | FAM105B     | MIER3          |
| SFT2D3        |               |                | HS3ST1       | USP36       | TTC38          |
| RUNDC3B       |               |                | LDOC1L       | PPP2R2D     | POGK           |
| PISD          |               |                | BRD3         | KLHDC5      | POLR3A         |
| PRKAB2        |               |                | ZNF343       | JHDM1D      | FAM222A        |
| FAT3          |               |                | NFIC         | SLC35B4     | 40057          |
| MAFK          |               |                | KIAA1147     | BCLAF1      | EEDP1          |
| C2orf42       |               |                | POLR2J2      | MED28       | KDM4B          |
| TRIP11        |               |                | ADAM29       | ENPP4       | LARP1          |
| DLGAP2        |               |                | SLC7A1       | WDR72       | KIAA1614       |
| PTCH1         |               |                | CSNK1G1      | FAM126B     | IGFBP5         |
| FGF7          |               |                | RALGPS2      | PCNX        | AKNA           |
| EIF2C4        |               |                | GABRA4       | FAT3        | TSPAN9         |
| USP15         |               |                | CCDC149      | FSTL3       | TUSC5          |
| EIF2C1        |               |                | RRP8         | CBX2        | hsa-mir-4763   |
| TACC1         |               |                | SORD         | CPEB4       | TTC3           |
| TNRC6B        |               |                | SOGA1        | DCAF5       | KIR3DX1        |
| DMPK          |               |                | SEC14L5      | CPA4        | TNRC6B         |
| BTLA          |               |                | C22orf29     | ZMAT3       | GATAD2B        |
| LAMP3         |               |                | RIMS4        | DNAJC5      | HRK            |
| NFATC3        |               |                | PLXNA4       | C16orf52    | ARID3B         |
| TFAP2A        |               |                | HIPK2        | NLRP11      | KCNMB1         |
| C1QL3         |               |                | PLEKHG4B     | TMEM79      | ZBTB4          |
| DZIP1         |               |                | AL033381.1   | TFCP2       | MLL2           |
| TLK1          |               |                | SGPL1        | EIF3F       | CPNE7          |
| AHCYL2        |               |                | C15orf38     | OAS3        | SLC28A3        |
| ATF6          |               |                | NOS1AP       | CREB5       | MAVS           |
| THAP6         |               |                | PRKCA        | SBNO1       | STMN3          |
| KDSR          |               |                | MGLL         | PLCXD1      | RNASE13        |
| SOGA1         |               |                | RFT1         | TNRC6B      | METTL21A       |
| MCFD2         |               |                | PRR14L       | SMCHD1      | CABP7          |
| KCNC2         |               |                | SHISA7       | DLGAP4      | MTAP           |
| MNT           |               |                | PRIMA1       | FAM219A     | SPIB           |
| SYNRG         |               |                | ORAI2        | MCAM        | TFIP11         |
| TBL1XR1       |               |                | TBC1D13      | GRIK3       | GNB1L          |
| SIK1          |               |                | ASXL3        | TM9SF3      | XCR1           |
| HRK           |               |                | FBXO41       | FAM120C     | SORCS2         |
| TMEM221       |               |                | UBE4A        | MYSM1       | HHLA2          |
| SLC11A2       |               |                | DGKG         | SPOPL       | VPS53          |
| CNOT6L        |               |                | PAX8         | PPARGC1A    | CSNK1G1        |
| DNAJB4        |               |                | SAMD4B       | HIPK2       | SENP2          |
| BTBD9         |               |                | POTEG        | DNM3        | SFTPB          |
| TTPAL         |               |                | LIMD1        | BRWD3       | ENY2           |
| FOXK1         |               |                | DNAJC18      | PEAK1       | SLC46A1        |
| C10orf54      |               |                | SSH2         | STRN        | ELN            |
| APLN          |               |                | KCNA7        | ST6GALNAC3  | NFIC           |
| HIPK2         |               |                | LPP          | TMEM132B    | SLC7A1         |
| SHOC2         |               |                | TFCP2L1      | C16orf53    | ICOSLG         |
| C14orf43      |               |                | PSAPL1       | KIAA2022    | BTBD9          |
| BCL11B        |               |                | MAPK1        | EAF1        | HIPK2          |
| SLC41A2       |               |                | ARNT2        | FIGN        | NOVA2          |
| PAFAH1B1      |               |                | SH3PXD2A     | FOXK1       | FOXP4          |
| ACVR2A        |               |                | WDFY1        | STK36       | ITGAX          |
| ITGA2         |               |                | SLC7A11      | VANGL1      | ARRB1          |
| DGCR14        |               |                | OXSRI        | MAP3K2      | RRP7A          |
| RWDD1         |               |                | PIP5K1C      | CDS2        | RRS24          |
| THSD4         |               |                | WSCD1        | ZNF571      | SLC25A45       |
| MAMSTR        |               |                | STX6         | NOS1AP      | ZSCAN12        |
| TUBA4A        |               |                | TOMM40L      | KLF11       | HS6ST1         |
| CD40          |               |                | PDXK         | FAM46A      | PAX5           |
| RFT1          |               |                | DNAJB12      | GPX6        | KALRN          |
| ELL           |               |                | UBXN10       | HIPK1       | ADAMTSL1       |

|                |  |  |           |             |               |
|----------------|--|--|-----------|-------------|---------------|
| TMEM189-UBE2V1 |  |  | H6PD      | OCLN        | SOX12         |
| TMEM189        |  |  | LRRC15    | PTCHD1      | SPOCK2        |
| FGFR1          |  |  | DHX33     | KIAA2026    | SEMA6A        |
| SLC1A2         |  |  | IGF2BP1   | C10orf216   | MOB3B         |
| TRIM66         |  |  | BAHD1     | C21orf91    | FAM212B       |
| FGF2           |  |  | ELK4      | PIK3R1      | CDS2          |
| AXIN2          |  |  | FZD5      | MMS22L      | C14orf43      |
| QSOX1          |  |  | CNNM1     | LCORL       | EGR3          |
| RPRD1B         |  |  | FAM26E    | KPNA4       | TNS1          |
| IVNS1ABP       |  |  | PPM1F     | AK4         | SLC29A4       |
| TRPC1          |  |  | MOB3C     | SLITRK4     | PADI2         |
| HAUS3          |  |  | CMKLR1    | NECAB1      | TNNI1         |
| PDK4           |  |  | PRND      | ATP9A       | DUSP3         |
| PPT2           |  |  | SHISA9    | NFASC       | VWA1          |
| ARHGAP35       |  |  | EHD3      | REEP3       | SYT7          |
| STK38L         |  |  | GRIN2A    | METTL9      | SHISA6        |
| SSR1           |  |  | TMEM194B  | PAIP2B      | PRIMA1        |
| MCU            |  |  | YY1       | ABI2        | CHRN2B        |
| ZBTB46         |  |  | KCNJ5     | EPHA4       | TNFAIP1       |
| STXB3          |  |  | CERS6     | MBOAT2      | SIRPB2        |
| COL12A1        |  |  | ARC       | FAM204A     | ZC3H7B        |
| SLC13A3        |  |  | MYO9A     | ZNF264      | HPCAL4        |
| UNC119B        |  |  | TNFRSF11A | CSRNP3      | RP3-324N14.2  |
| NUP50          |  |  | POTEM     | CNOT6       | ADAM23        |
| KIAA0317       |  |  | CBFA2T2   | U47924.25   | DNAJB5        |
| ZNF609         |  |  | USH1G     | AP000708.1  | CLIP2         |
| PAQR3          |  |  | LONRF2    | BACH2       | ABCG4         |
| ZMYM2          |  |  | ZHX3      | LANCL3      | STX1B         |
| POLR1A         |  |  | GFRA1     | AFF1        | CBLN3         |
| INSR           |  |  | IQSEC3    | STX1B       | HSPG2         |
| LSM11          |  |  | PPP1R12B  | RTF1        | SAMD4B        |
| UBE2V1         |  |  | C22orf46  | GLRA3       | EIF5A1.1      |
| PHF19          |  |  | TMEM178B  | ZFX         | VANGL2        |
| SLC9A8         |  |  |           | TFAM        | TSKU          |
| UNC80          |  |  |           | RNF38       | KIAA1161      |
| ARL10          |  |  |           | CPSF6       | KCNQ4         |
| LIMD1          |  |  |           | CCDC71L     | DIRAS1        |
| MTHFR          |  |  |           | UBE2H       | CMIP          |
| DRD1           |  |  |           | SLC6A19     | FBXO41        |
| CCNJL          |  |  |           | EPG5        | ARNT2         |
| DCUN1D1        |  |  |           | SLC7A11     | HOXC12        |
| CCNT1          |  |  |           | RAP2B       | MAPK1         |
| RBM12          |  |  |           | VAPB        | SLC38A7       |
| PID1           |  |  |           | ZC3H12C     | C11orf45      |
| FASN           |  |  |           | POU2F1      | KCNAB2        |
| CYB5B          |  |  |           | SSBP2       | ZNF609        |
| PTCD3          |  |  |           | MON2        | SYNGAP1       |
| VAPB           |  |  |           | SMAD2       | SH3PXD2A      |
| SRRM4          |  |  |           | TCF21       | RAMP2         |
| TGIF2          |  |  |           | AGPS        | RIMS3         |
| PDCD1          |  |  |           | SMAD4       | ZCCHC24       |
| C5orf64        |  |  |           | ZNF304      | TBR1          |
| NUCKS1         |  |  |           | STRBP       | LYPLA2        |
| C18orf1        |  |  |           | FAM26E      | KCNJ8         |
| ANO3           |  |  |           | EDNRA       | EPB41L1       |
| CD80           |  |  |           | GNAI1       | ANKRD52       |
| TBC1D16        |  |  |           | ABCC6       | PATL1         |
| RASGEF1B       |  |  |           | TCF4        | TEAD3         |
| POU2F1         |  |  |           | HSPA4       | HIC2          |
| ASB1           |  |  |           | ELK4        | GSX1          |
| PTPN4          |  |  |           | BLCAP       | PEA15         |
| GFAP           |  |  |           | CPLX2       | FLT4          |
| PRTG           |  |  |           | CDK6        | ZNF516        |
| AL158821.1     |  |  |           | GADL1       | NMT1          |
| TMEM43         |  |  |           | GLCC11      | ASTN1         |
| RPS6KA3        |  |  |           | NHLRC2      | CTD-2616J11.4 |
| WNT7A          |  |  |           | PALM2-AKAP2 | TCEB3         |
| SLC9A6         |  |  |           | WIPF2       | GIT1          |
| ARFGAP2        |  |  |           | RSF1        | CDC42BPA      |
| E2F7           |  |  |           | MACC1       | AR            |
| C14orf37       |  |  |           | LNPEP       | PDXK          |
| LATS1          |  |  |           | TP53INP1    | TMEM104       |
| CLCN5          |  |  |           | NKTR        | SLC6A17       |
| ARIH1          |  |  |           | PDE5A       | NF2           |
| FOSL2          |  |  |           | LARP4       | HNRNPUL1      |
| NCS1           |  |  |           | RABGAP1     | L1CAM         |
| PVRL1          |  |  |           | TMEM178B    | OPTC          |
| RAB30          |  |  |           | IYD         | RABL2A        |
| EDA            |  |  |           | ATXN1       | ENTPD2        |
| ABHD2          |  |  |           | IMPAD1      | ARHGEF11      |
| FAM123B        |  |  |           | PDE3A       | N4BP3         |
| ENTPD1         |  |  |           | AMMECR1     | PPP1R10       |
| ADAMTS12       |  |  |           | TNFRSF21    | EHD2          |
| HTR2A          |  |  |           | PCGF3       | TRIOBP        |
| IYD            |  |  |           | IGF1R       | C10orf105     |
| SNRNP48        |  |  |           | PRRG1       | ALPK3         |
| PTPN3          |  |  |           | MGAT4A      | AGPAT1        |
| RAB11FIP2      |  |  |           | SLC44A1     | AKT2          |
| WEE1           |  |  |           | AKAP11      | PVRL1         |
| WNK3           |  |  |           | NUFIP2      | CPLX2         |
| NRP2           |  |  |           |             | ZNF703        |
| IGF1R          |  |  |           |             | KIF21B        |
| TECPR2         |  |  |           |             | IGF2BP1       |
| PPAPDC2        |  |  |           |             | ONECUT2       |
| PPM1L          |  |  |           |             | HMX1          |
| GRM1           |  |  |           |             | SLC6A4        |

|          |  |  |  |  |          |
|----------|--|--|--|--|----------|
| DCLK1    |  |  |  |  | UBTF     |
| HS3ST5   |  |  |  |  | MRPL22   |
| ZFYVE20  |  |  |  |  | C1orf21  |
| CLOCK    |  |  |  |  | SEMA4G   |
| TBRG1    |  |  |  |  | RGS5     |
| PPP1R12B |  |  |  |  | GPR153   |
| BCL2L2   |  |  |  |  | ALPI     |
| PAPPA    |  |  |  |  | GLP2R    |
| KIAA0247 |  |  |  |  | PLA2G2D  |
| PLSCR4   |  |  |  |  | DRP2     |
| IP6K1    |  |  |  |  | TXNL1    |
| CYBASC3  |  |  |  |  | ZDHHC3   |
| TRANK1   |  |  |  |  | MBD2     |
|          |  |  |  |  | PRDM16   |
|          |  |  |  |  | IQSEC3   |
|          |  |  |  |  | SLIT3    |
|          |  |  |  |  | MEF2D    |
|          |  |  |  |  | DUSP8    |
|          |  |  |  |  | ARF3     |
|          |  |  |  |  | GRAMD1B  |
|          |  |  |  |  | IGSF9B   |
|          |  |  |  |  | USP13    |
|          |  |  |  |  | ELAVL3   |
|          |  |  |  |  | SLAMF8   |
|          |  |  |  |  | NACC1    |
|          |  |  |  |  | SLC25A23 |

**Table 2: DAVID analysis, functional annotation of miR-16, miR-21, miR-155, miR-326, miR-329 & miR-491 targets.**

| Term                                             | Count | %           | PValue      | Genes                                                                                                                                          | List Total | Pop Hits | Pop Total | Fold Enrichment | Bonferroni  | Benjamini   | FDR\                |
|--------------------------------------------------|-------|-------------|-------------|------------------------------------------------------------------------------------------------------------------------------------------------|------------|----------|-----------|-----------------|-------------|-------------|---------------------|
| hsa05200:Pathways in cancer                      | 22    | 3,475513428 | 0,004232701 | PRKCA, FGFR1, AR, FGF7, STK36, CBL, ARNT2, SMAD4, ITGA2, CDK6, SMAD2, FZD5, MAPK1, IGF1R, PAX8, MAPK9, PTCH1, AXIN2, FGF2, WNT7A, PIK3R1, AKT2 | 177        | 328      | 5085      | 1,926932617     | 0,416490107 | 0,164366053 | 4.8000775655472\    |
| hsa04310:Wnt signaling pathway                   | 16    | 2,52764613  | 1,98E-04    | PRKCA, TBL1XR1, VANGL1, VANGL2, SMAD4, SMAD2, FZD5, SENP2, PRICKLE2, NFAT5, MAPK9, SOX17, AXIN2, NFATC2, WNT7A, NFATC3                         | 177        | 151      | 5085      | 3,044112695     | 0,024836372 | 0,024836372 | 0.2293947643564942\ |
| hsa04010:MAPK signaling pathway                  | 16    | 2,52764613  | 0,042239183 | PRKCA, FGFR1, CACNA2D1, FGF7, MAPK1, RPS6KA3, DUSP3, ELK4, ARRB1, MAP3K2, MAPK9, NFATC2, DUSP8, PLA2G2D, FGF2, AKT2                            | 177        | 267      | 5085      | 1,721576843     | 0,99583469  | 0,344011919 | 39.37704687205608\  |
| hsa04144:Endocytosis                             | 14    | 2,211690363 | 0,010805424 | GIT1, DNM3, ARFGAP2, CBL, PIP5K1C, ZFYVE20, RAB11FIP4, IGF1R, RAB11FIP2, ARRB1, RAB22A, IQSEC3, EHD2, EHD3                                     | 177        | 184      | 5085      | 2,185887988     | 0,748360265 | 0,205434197 | 11.837905205473731\ |
| hsa04360:Axon guidance                           | 13    | 2,05371248  | 0,001553843 | ABLIM1, GNAI1, L1CAM, SLIT1, SLIT3, SEMA6A, EPHA4, MAPK1, SEMA4G, NFAT5, SRGAP3, NFATC2, NFATC3                                                | 177        | 129      | 5085      | 2,895151754     | 0,179212901 | 0,094026988 | 1.7872382072132265\ |
| hsa04910:Insulin signaling pathway               | 12    | 1,895734597 | 0,006717384 | MAPK1, PPP1R3B, TSC1, PRKAB2, CBL, FASN, MAPK9, PDE3A, INSR, PPARGC1A, PIK3R1, AKT2                                                            | 177        | 135      | 5085      | 2,553672316     | 0,57513595  | 0,192648798 | 7.518792826147158\  |
| hsa05210:Colorectal cancer                       | 9     | 1,421800948 | 0,008126379 | IGF1R, MAPK1, SMAD4, MAPK9, SMAD2, AXIN2, FZD5, PIK3R1, AKT2                                                                                   | 177        | 84       | 5085      | 3,078087167     | 0,645223186 | 0,187186242 | 9.028789983429174\  |
| hsa04660:T cell receptor signaling pathway       | 9     | 1,421800948 | 0,032697031 | MAPK1, CBL, NFAT5, MAPK9, NFATC2, NFATC3, PDCD1, PIK3R1, AKT2                                                                                  | 177        | 108      | 5085      | 2,394067797     | 0,985329661 | 0,344392348 | 31.990793922795746\ |
| hsa05218:Melanoma                                | 8     | 1,263823065 | 0,010861274 | IGF1R, FGFR1, MAPK1, FGF7, CDK6, FGF2, PIK3R1, AKT2                                                                                            | 177        | 71       | 5085      | 3,237049415     | 0,750158206 | 0,179738825 | 11.895613220909096\ |
| hsa04370:VEGF signaling pathway                  | 8     | 1,263823065 | 0,014448871 | PRKCA, MAPK1, NFAT5, NFATC2, PLA2G2D, NFATC3, PIK3R1, AKT2                                                                                     | 177        | 75       | 5085      | 3,06440678      | 0,84250988  | 0,206299481 | 15.531098437996116\ |
| hsa04914:Progesterone-mediated oocyte maturation | 8     | 1,263823065 | 0,028546524 | IGF1R, MAPK1, RPS6KA3, GNAI1, MAPK9, PDE3A, PIK3R1, AKT2                                                                                       | 177        | 86       | 5085      | 2,672447773     | 0,974730606 | 0,335476206 | 28.528603158848597\ |
| hsa04540:Gap junction                            | 8     | 1,263823065 | 0,033605109 | PRKCA, MAPK1, DRD1, GNAI1, MAP3K2, TUBA4A, GRM1, HTR2A                                                                                         | 177        | 89       | 5085      | 2,582365264     | 0,986979207 | 0,326087668 | 32.72753830384178\  |
| hsa05215:Prostate cancer                         | 8     | 1,263823065 | 0,033605109 | IGF1R, FGFR1, MAPK1, AR, CREB3L2, CREB5, PIK3R1, AKT2                                                                                          | 177        | 89       | 5085      | 2,582365264     | 0,986979207 | 0,326087668 | 32.72753830384178\  |
| hsa04270:Vascular smooth muscle contraction      | 8     | 1,263823065 | 0,092217663 | PRKCA, EDNRA, MAPK1, RAMP2, PPP1R12B, PLA2G2D, KCNMB1, ARHGEF11                                                                                | 177        | 112      | 5085      | 2,052058111     | 0,99999539  | 0,459016554 | 67.4379576306945\   |
| hsa05212:Pancreatic cancer                       | 7     | 1,105845182 | 0,037438969 | MAPK1, SMAD4, MAPK9, CDK6, SMAD2, PIK3R1, AKT2                                                                                                 | 177        | 72       | 5085      | 2,793079096     | 0,992140571 | 0,332246895 | 35.758342494522765\ |
| hsa04520:Adherens junction                       | 7     | 1,105845182 | 0,049410736 | IGF1R, FGFR1, MAPK1, PVRL1, SMAD4, SMAD2, INSR                                                                                                 | 177        | 77       | 5085      | 2,611710324     | 0,998396389 | 0,368513298 | 44.43741714216388\  |
| hsa04012:ErbB signaling pathway                  | 7     | 1,105845182 | 0,079737075 | PRKCA, MAPK1, CBL, MAPK9, ABL2, PIK3R1, AKT2                                                                                                   | 177        | 87       | 5085      | 2,311513735     | 0,99997389  | 0,462472291 | 61.85088371616558\  |
| hsa05214:Glioma                                  | 6     | 0,947867299 | 0,065784631 | PRKCA, IGF1R, MAPK1, CDK6, PIK3R1, AKT2                                                                                                        | 177        | 63       | 5085      | 2,736077482     | 0,99982349  | 0,43793743  | 54.57737681746657\  |
| hsa00564:Glycerophospholipid metabolism          | 6     | 0,947867299 | 0,085236782 | CDS2, DGKG, LYPLA2, PISD, PLA2G2D, AGPAT1                                                                                                      | 177        | 68       | 5085      | 2,534895314     | 0,999987804 | 0,466651182 | 64.41273230531918\  |
| hsa04730:Long-term depression                    | 6     | 0,947867299 | 0,089454964 | PRKCA, IGF1R, MAPK1, GNAI1, PLA2G2D, GRM1                                                                                                      | 177        | 69       | 5085      | 2,498157701     | 0,999993219 | 0,465482168 | 66.27000267451388\  |
| hsa04930:Type II diabetes mellitus               | 5     | 0,789889415 | 0,078195247 | MAPK1, MAPK9, INSR, ADIPOQ, PIK3R1                                                                                                             | 177        | 47       | 5085      | 3,056256762     | 0,999967704 | 0,476011674 | 61.10303226748772\  |

**Table 3: DAVID analysis, functional annotation of miR-326, miR-329 & miR-491 targets.**

| Term                                             | Count | %           | PValue      | Genes                                                                                    | List Total | Pop Hits | Pop Total | Fold Enrichment | Bonferroni  | Benjamini   | FDR\                  |
|--------------------------------------------------|-------|-------------|-------------|------------------------------------------------------------------------------------------|------------|----------|-----------|-----------------|-------------|-------------|-----------------------|
| hsa05200:Pathways in cancer                      | 14    | 3,03030303  | 0,058079835 | PRKCA, AR, STK36, CBL, ARNT2, SMAD4, SMAD2, CDK6, FZD5, IGF1R, MAPK1, PAX8, PIK3R1, AKT2 | 126        | 328      | 5085      | 1,722560976     | 0,998529259 | 0,352605379 | 49.07871667024287\    |
| hsa04360:Axon guidance                           | 12    | 2,597402597 | 2,90E-04    | ABLIM1, EPHA4, MAPK1, SEMA6A, SEMA4G, GNAI1, SRGAP3, NFAT5, L1CAM, NFATC2, SLIT1, SLIT3  | 126        | 129      | 5085      | 3,754152824     | 0,03112607  | 0,03112607  | 0.32667407699999984 \ |
| hsa04310:Wnt signaling pathway                   | 11    | 2,380952381 | 0,003761237 | PRKCA, SENP2, VANGL1, VANGL2, PRICKLE2, NFAT5, SMAD4, SMAD2, SOX17, NFATC2, FZD5         | 126        | 151      | 5085      | 2,939924314     | 0,336845832 | 0,185657217 | 4.1613168217404795\   |
| hsa04144:Endocytosis                             | 10    | 2,164502165 | 0,036395256 | RAB11FIP4, GIT1, DNM3, IGF1R, ARRB1, CBL, PIP5K1C, IQSEC3, EHD2, EHD3                    | 126        | 184      | 5085      | 2,193322981     | 0,98242144  | 0,332427668 | 34.17474750466888\    |
| hsa04270:Vascular smooth muscle contraction      | 8     | 1,731601732 | 0,019700972 | PRKCA, EDNRA, MAPK1, RAMP2, PPP1R12B, PLA2G2D, KCNMB1, ARHGEF11                          | 126        | 112      | 5085      | 2,882653061     | 0,885689962 | 0,30335093  | 20.102817779701667\   |
| hsa04530:Tight junction                          | 8     | 1,731601732 | 0,04603243  | PRKCA, EPB41L1, OCLN, GNAI1, ASH1L, AMOTL1, PPP2R2D, AKT2                                | 126        | 134      | 5085      | 2,409381663     | 0,994122893 | 0,326407563 | 41.230070966868153\   |
| hsa04910:Insulin signaling pathway               | 8     | 1,731601732 | 0,047595708 | MAPK1, PPP1R3B, TSC1, CBL, PDE3A, PPARC1A, PIK3R1, AKT2                                  | 126        | 135      | 5085      | 2,391534392     | 0,995084966 | 0,315916626 | 42.307235574911154\   |
| hsa04370:VEGF signaling pathway                  | 7     | 1,515151515 | 0,009873027 | PRKCA, MAPK1, NFAT5, NFATC2, PLA2G2D, PIK3R1, AKT2                                       | 126        | 75       | 5085      | 3,766666667     | 0,660916073 | 0,302674199 | 10.5878301348873\     |
| hsa05210:Colorectal cancer                       | 7     | 1,515151515 | 0,016679112 | IGF1R, MAPK1, SMAD4, SMAD2, FZD5, PIK3R1, AKT2                                           | 126        | 84       | 5085      | 3,363095238     | 0,84012379  | 0,367666835 | 17.2804226791916\     |
| hsa05215:Prostate cancer                         | 7     | 1,515151515 | 0,021604876 | IGF1R, MAPK1, AR, CREB3L2, CREB5, PIK3R1, AKT2                                           | 126        | 89       | 5085      | 3,174157303     | 0,907518156 | 0,288305216 | 21.83568895241311\    |
| hsa05214:Glioma                                  | 6     | 1,298701299 | 0,018685323 | PRKCA, IGF1R, MAPK1, CDK6, PIK3R1, AKT2                                                  | 126        | 63       | 5085      | 3,843537415     | 0,872031196 | 0,337141511 | 19.16415552442352\    |
| hsa05212:Pancreatic cancer                       | 6     | 1,298701299 | 0,031274388 | MAPK1, SMAD4, CDK6, SMAD2, PIK3R1, AKT2                                                  | 126        | 72       | 5085      | 3,363095238     | 0,968675422 | 0,351386993 | 30.11956032439094\    |
| hsa04070:Phosphatidylinositol signaling system   | 6     | 1,298701299 | 0,03465065  | PRKCA, CDS2, DGKG, PIK3C3, PIP5K1C, PIK3R1                                               | 126        | 74       | 5085      | 3,272200772     | 0,978590259 | 0,347602362 | 32.81795000096294\    |
| hsa05220:Chronic myeloid leukemia                | 6     | 1,298701299 | 0,03642048  | MAPK1, CBL, SMAD4, CDK6, PIK3R1, AKT2                                                    | 126        | 75       | 5085      | 3,228571429     | 0,982471525 | 0,3076266   | 34.19417989075774\    |
| hsa04914:Progesterone-mediated oocyte maturation | 6     | 1,298701299 | 0,05956259  | IGF1R, MAPK1, GNAI1, PDE3A, PIK3R1, AKT2                                                 | 126        | 86       | 5085      | 2,815614618     | 0,998761321 | 0,341872677 | 49.97557269902019\    |
| hsa04012:ErbB signaling pathway                  | 6     | 1,298701299 | 0,062003625 | PRKCA, MAPK1, CBL, ABL2, PIK3R1, AKT2                                                    | 126        | 87       | 5085      | 2,783251232     | 0,999066904 | 0,336623046 | 51.42074376050009\    |
| hsa04666:Fc gamma R-mediated phagocytosis        | 6     | 1,298701299 | 0,083541552 | PRKCA, DNM3, MAPK1, PIP5K1C, PIK3R1, AKT2                                                | 126        | 95       | 5085      | 2,54887218      | 0,999925819 | 0,410380515 | 62.61806123351181\    |
| hsa05223:Non-small cell lung cancer              | 5     | 1,082251082 | 0,042819904 | PRKCA, MAPK1, CDK6, PIK3R1, AKT2                                                         | 126        | 54       | 5085      | 3,736772487     | 0,991521699 | 0,328015789 | 38.95875819096904\    |
| hsa00564:Glycerophospholipid metabolism          | 5     | 1,082251082 | 0,085227741 | CDS2, DGKG, LYPLA2, PLA2G2D, AGPAT1                                                      | 126        | 68       | 5085      | 2,967436975     | 0,99993931  | 0,400127839 | 63.386539134450274\   |
| hsa04730:Long-term depression                    | 5     | 1,082251082 | 0,088834843 | PRKCA, IGF1R, MAPK1, GNAI1, PLA2G2D                                                      | 126        | 69       | 5085      | 2,924430642     | 0,999960547 | 0,397711993 | 64.98235163378081\    |
| hsa05218:Melanoma                                | 5     | 1,082251082 | 0,096267041 | IGF1R, MAPK1, CDK6, PIK3R1, AKT2                                                         | 126        | 71       | 5085      | 2,842052314     | 0,999983843 | 0,408673564 | 68.07234673725269\    |

**Table 4:** Pubmed IDs of relevant literature taken as a basis for the selection.

| miRNAs                                                                                  |
|-----------------------------------------------------------------------------------------|
| miR-326: 25760058, 25138213, 25087086, 23869222, 23522246, 23341351, 20667897, 19955368 |
| miR-329: 26337669, 26320179, 24944161, 24423585                                         |
| miR-491: 26034994, 25299770, 24148764, 23519249, 21373755, 20039318                     |
| lncRNAs                                                                                 |
| ANRIL: 25636450                                                                         |
| GAS5: 24884417                                                                          |
| H19: 22776265                                                                           |
| NEAT1: 25417700                                                                         |
| PRINS: 20377629                                                                         |
| PTENP1: 20577206                                                                        |
| WT1: 26071132                                                                           |

RNAhybrid parameters: default with mfe  $\leq$  -20 kcal/mol and helix constraint from 2-8.

**hsa-miR-155**

No interaction.

**hsa-miR-326**

**binding site #1:** position 1754

mfe: -21.1 kcal/mol

```
PRINS (HG975433.1) 5'  A   U  CCUGAUUCU   UUUCCUGCCCC   U 3'
                    GGAG GG       GGGG           CCUGGGG
                    CCUC CU       UCCC           GGGUCUC
hsa-miR-326      3' GA                                     C 5'
```

**hsa-miR-329**

**binding site #1:** position 1082

mfe: -27.4 kcal/mol

```
PRINS (HG975433.1) 5'  A   U   AU       A 3'
                    GGAA CCCAG  AGGACCUC
                    UCUU GGGUC  UUUUGGAG
hsa-miR-329      3' CUUUG   U                                     5'
```

**hsa-miR-329**

**binding site #2:** position 584

mfe: -25.0 kcal/mol

```
PRINS (HG975433.1) 5' U           GAAUGGCAUGA   GAGGU   G 3'
                    GAGGCAGGA   ACCCGG   GGAGCUU
                    CUUUGUCUU           UGGGUC   UUUUGGA
hsa-miR-329      3'                                     G 5'
```

**hsa-miR-491-5p**

**binding site #1:** position 1552

mfe: -27.5 kcal/mol

```
PRINS (HG975433.1) 5'  G           C  CGGG           C 3'
                    UUGUGGAG GGG   UCCCCG
                    AGUACCUU CCC   GGGGUG
hsa-miR-491-5p   3' GG           AA           A 5'
```

**binding site #2:** position 1761

mfe: -26.8 kcal/mol

```
PRINS (HG975433.1) 5'  G   G  UCU           U 3'
                    CCU AU   GGGGUUCC
                    GGA UA   UCCCAAGGG
hsa-miR-491-5p   3'  G           CCU           UGA 5'
```

**binding site #3:** position 183

mfe: -23.6 kcal/mol

```
PRINS (HG975433.1) 5'  U   UUUA   C  GG           G 3'
                    UCUU   GAGG GG  UCUCACU
                    GGAG   CUUC CC  GGGGUGA
hsa-miR-491-5p   3'           UAC           AA           5'
```

**Figure 2:** RNAHybrid analysis of PRINS interaction with miR-155, miR-326, miR-329 & miR-491.

Binding site #1:  
GGCCGCGgacgagctggttggaggagggggggtcccgcaccctggggcT  
CGctgctcgaccaacacctcgcccggcagggcggtgggcacccgAGATC

Binding site #2:  
GGCCGCTacaggagtggcctgattctggggtttccctgccccctgt  
CGatgtcctcacggactaagaccctcaagggaagggggggacAGATC

Binding site #3:  
GGCCGCTtttttaaatctcttttagaggggggtctcactgtgttttgcccT  
CGaaaaaatttaagaaaaatctccgcccagagtgcacaaaaacgggAGATC

Binding site #3m:  
GGCCGCTtttttaaatctcttttagCCCTTTCACTATCTGCGtgttttgcccT  
CGaaaaaatttaagaaaaatcGGGAAAGTGATAGACGacaaaaacgggAGATC

**Figure 3:** Luciferase reporter constructs for interaction studies; hsa-miR-491-5p binding-sites cloned in pTK-Gluc (NotI/XbaI). Yellow marks show predicted binding-sites and red letters depict the mutated site.

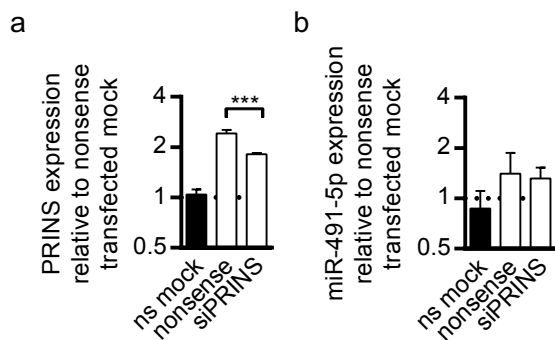

**Figure 4:** a) Knock down efficiency of siRNA vs. PRINS in HT-29/B6/TFF3. b) Expression of miR-491-5p after specific knockdown of PRINS. Black columns show nonsense transfected mock controls and white columns HT-29/B6/TFF3 cells.

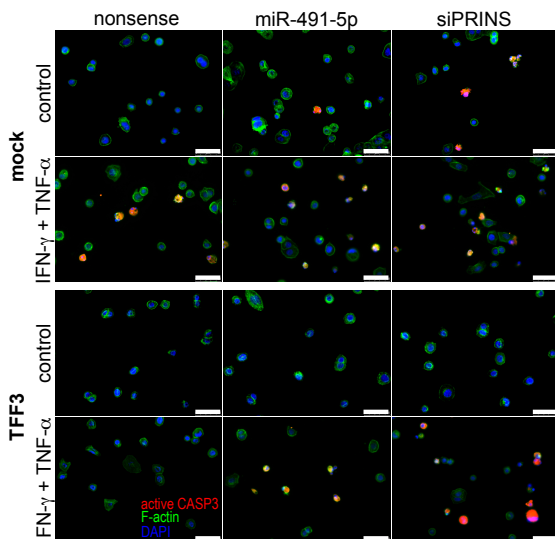

**Figure 5:** Transfected cells were seeded at reduced density and apoptotic cells (stained for active caspase-3, stained red) were counted automatically using ImageJ (96 images, 8 replicates per treatment). Nuclei were stained with DAPI (blue) and F-actin was stained with Phalloidin-conjugates (green).



**Table 5:** Sequence and position of Stellaris FISH probes against PRINS

| PRINS Probe | Sequence (5'-3')     | Position |
|-------------|----------------------|----------|
| 1           | tgacatggcttttataca   | 345      |
| 2           | cctctctctgattattgga  | 710      |
| 3           | tgtcctcattagtcttctag | 732      |
| 4           | cagggcaaccatttctgttt | 839      |
| 5           | cctccctgaaagaacacag  | 868      |
| 6           | gtgtgtgagatgaaggtacc | 914      |
| 7           | tcaaagcacaatgcacgcc  | 941      |
| 8           | ccaagaagtgactgatccta | 1019     |
| 9           | gccactggaaatgagactac | 1046     |
| 10          | attcctttgccaaggaag   | 1068     |
| 11          | gtttagaaagatgaggtcct | 1095     |
| 12          | gcaaacatgggatggtagg  | 1131     |
| 13          | gttgataattccaggcaact | 1165     |
| 14          | gagtcaaaagatgccctgac | 1207     |
| 15          | ctttccgtagttctactg   | 1353     |
| 16          | gggttaggtaaaccggat   | 1406     |
| 17          | tactatgcaaatgccacctg | 1430     |
| 18          | cacagctagaaaataccggt | 1457     |
| 19          | cgctcaggattgaagtgtg  | 1480     |
| 20          | ttaatgttctgggagcagtc | 1595     |
| 21          | gatgtggcatggaacatcag | 1623     |
| 22          | cagacatgggtcttcatgtc | 1645     |
| 23          | ctttggcccttctacagaag | 1667     |
| 24          | cagggaaaccccagaatcag | 1763     |
| 25          | tcacacagcagtttagggac | 1794     |
| 26          | ggaacaactgactcttgggt | 1840     |
| 27          | gaaagaaaccagattggccc | 1899     |
| 28          | tcattctctgctgagaagc  | 1931     |
| 29          | caaggtttaactgctgtggg | 1954     |
| 30          | accatactagaaacatcct  | 2062     |
| 31          | ggcaaggtaagatgaactga | 2086     |
| 32          | cacactcattcttccagagc | 2108     |
| 33          | ggcatttctaaatctgatcc | 2130     |
| 34          | cactcggcttctaaccttt  | 2152     |
| 35          | ctgagcttgagttaatcggc | 2174     |

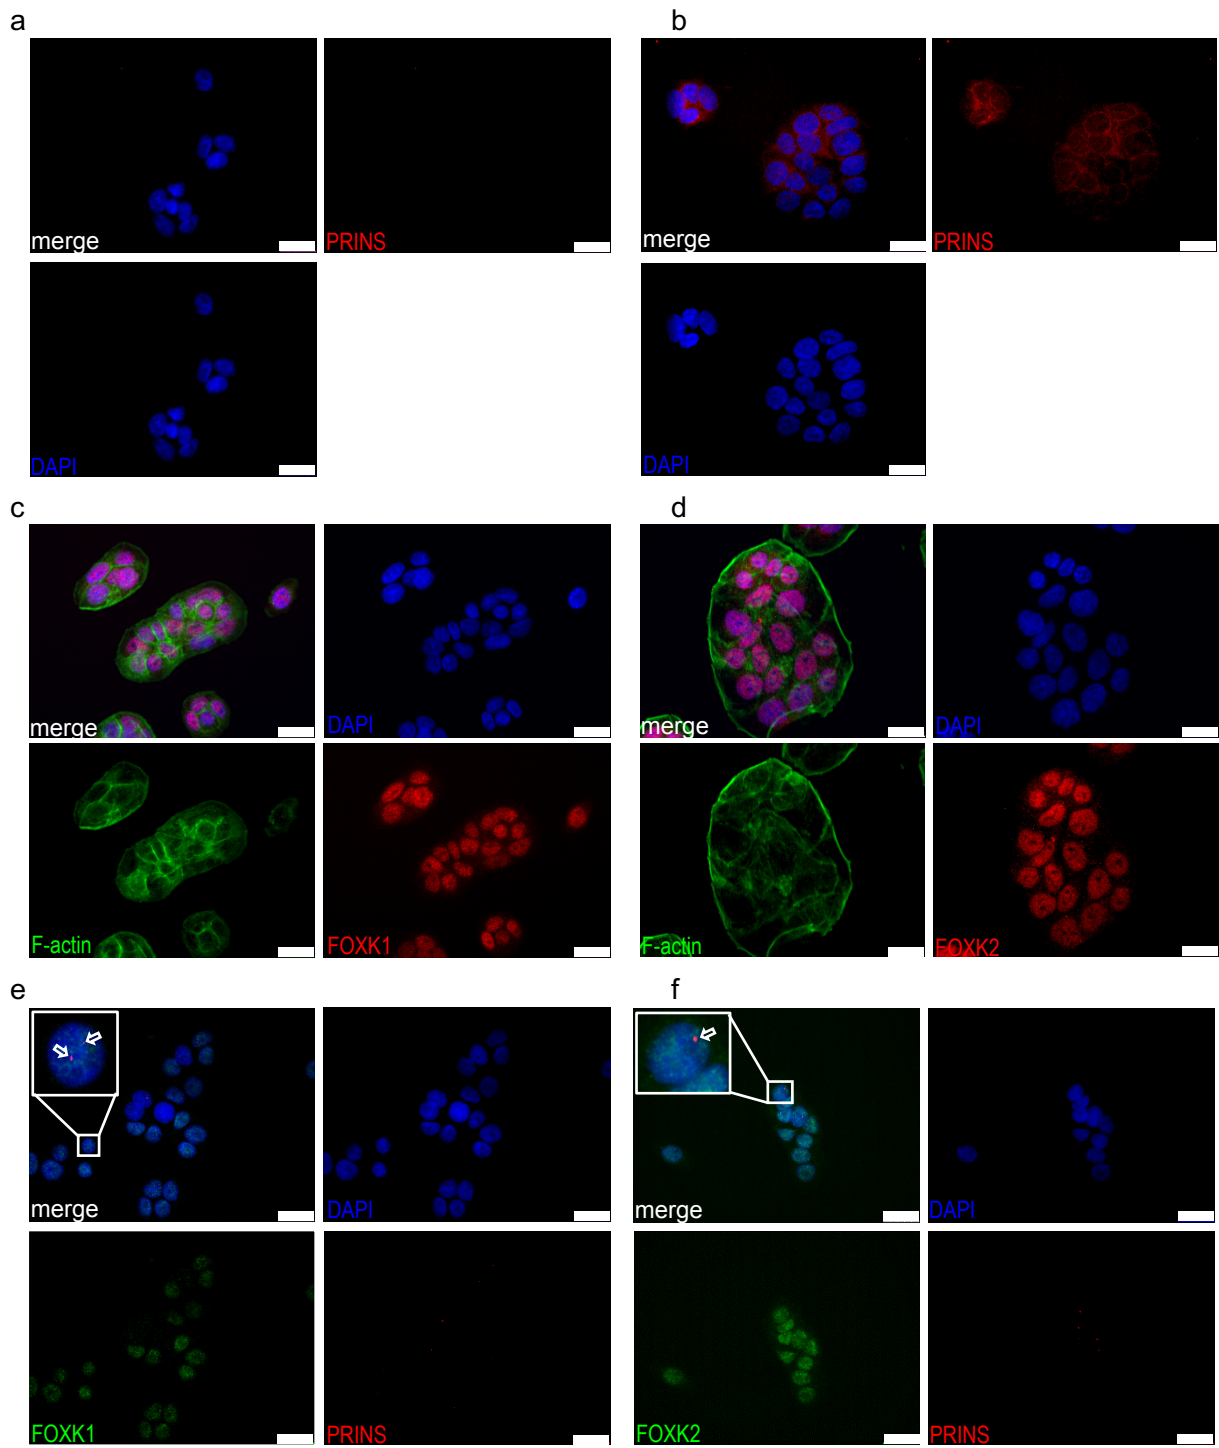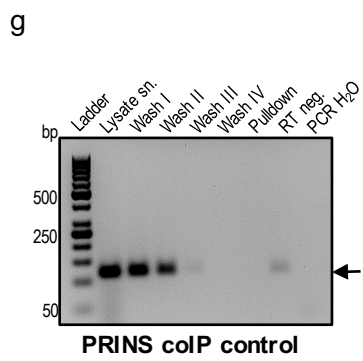

**Figure 6:** Controls for PRINS-specific Stellaris FISH and co-localisation studies with FOXK1 and 2; a) Stellaris FISH without probes; b) Stellaris FISH after RNase treatment with probes, in RNase treated controls focal signals disappeared and a scattered PRINS signal remained due to potential binding of probes to PRINS artefacts; c) FOXK1 IF detection; d) FOXK2 IF detection; e) Co-localisation of FOXK1 and PRINS; f) Co-localisation of FOXK2 and PRINS. g) CoIP control experiments using normal rabbit IgG instead of PMAIP1-specific antibody proved absence of non-specific PRINS binding in pulldown samples.
